1 Dissecting genetic and sex-specific host heterogeneity in pathogen transmission

2 **potential**

3

4

5 Jonathon A. Siva-Jothy<sup>1</sup>; Pedro F. Vale<sup>1,2</sup>

6

7 <sup>1</sup> Institute of Evolutionary Biology, School of Biological Sciences, University of

8 Edinburgh, EH9 3FL Edinburgh, United Kingdom

9 <sup>2</sup> Centre for Immunity, Infection and Evolution, University of Edinburgh, EH9 3FL

10 Edinburgh, United Kingdom

## 11 Abstract

12 Heterogeneity in disease transmission is widespread and, when not accounted for, can  
13 produce unpredictable outbreaks of infectious disease. Despite this, precisely how  
14 different sources of variation in host traits drive heterogeneity in disease transmission is  
15 poorly understood. Here we dissected the sources of variation in pathogen transmission  
16 using *Drosophila melanogaster* and *Drosophila C Virus* as a host-pathogen model  
17 system. We found that infected lifespan, viral growth, virus shedding, and viral load at  
18 death were all significantly influenced by fly genetic background, sex and female mating  
19 status. To understand how variation in each of these traits may generate heterogeneity  
20 in disease transmission, we estimated individual transmission potential by integrating  
21 data on virus shedding and lifespan alongside previously collected data on social  
22 aggregation. We found that ~15% of between-individual heterogeneity in disease  
23 transmission was explained by a significant interaction between genetic and sex-specific  
24 variation. We also characterised the amount of variation in viral load, virus shedding, and  
25 lifespan following infection that could be explained by genetic background and sex.  
26 Amongst the determinants of individual variation in disease transmission these sources  
27 of host variation play roles of varying importance, with genetic background generally  
28 playing the largest role. Our results highlight the importance of characterising sources of  
29 variation in multiple host traits when studying disease transmission at the individual-level.

30

31 **Keywords:** Superspreaders; viral transmission; *Drosophila C Virus*; *Drosophila*  
32 *melanogaster*; individual variation; heterogeneity;  $V$ ;  $R_0$ ; genetic variation; sexual  
33 dimorphism

## 34 Introduction

35 Individual host heterogeneity in disease spread is commonly observed across a wide  
36 range of infectious diseases (Woolhouse et al., 1997; Lloyd-Smith et al., 2005; Paull  
37 et al., 2011). Such heterogeneity is so common that it has been generalised into the  
38 '20-80 rule' because of the frequent observation that 20% of hosts contribute to  
39 roughly 80% of transmission (Shaw & Dobson, 1995; Wilson et al., 2002; Woolhouse  
40 et al., 1997). More extreme forms of heterogeneity can result in very rare  
41 'superspreading' individuals capable of causing large outbreaks of infectious  
42 disease in human and animal populations (Brooks-Pollock, Roberts, & Keeling, 2014;  
43 Lloyd-Smith et al., 2005). A superspreader of particular infamy is Mary Mallon who  
44 became known as 'Typhoid Mary' by infecting over 50 people with *Salmonella typhi*  
45 while working as a cook in New York during the early 20<sup>th</sup> century (Marineli, Tsoucalas,  
46 Karamanou, & Androutsos, 2013). More recently, the 2003 outbreaks of SARS in  
47 Singapore and Hong Kong were greatly accelerated by a few superspreading  
48 individuals who caused over 70% of all SARS transmission (Li et al., 2004).

49

50 Outbreaks of infectious disease are often difficult to predict, especially when the  
51 effect of superspreaders are not accounted for by traditional assessments of  
52 outbreak risk. A widely used metric for the rate of pathogen spread is the basic  
53 reproductive number,  $R_0$ , which estimates the average number of expected  
54 secondary infections caused by a single infected individual in a completely  
55 susceptible population. By focussing on the population average,  $R_0$  conceals outliers  
56 with a potentially higher propensity to spread disease (Lloyd-Smith et al., 2005; Paull  
57 et al., 2012; VanderWaal & Ezenwa, 2016). A clearer understanding of what drives  
58 heterogeneity in disease transmission requires a framework capable of accounting  
59 for such between-individual variation, which could enable more efficient control  
60 strategies that specifically target and treat high-risk individuals (Lloyd-Smith et al.,  
61 2005). The importance of predicting high-risk individuals before outbreaks occur has  
62 pushed understanding the causes of heterogeneity in disease transmission to the

63 forefront of epidemiology and disease ecology research (Gervasi, Civitello, Kilvitis, &  
64 Martin, 2015; Paull et al., 2012; Stein, 2011; VanderWaal & Ezenwa, 2016).

65

66 Despite being commonplace, the underlying causes of heterogeneity in pathogen  
67 transmission remain elusive. Individual variation in host contact networks may be an  
68 important factor: it was Typhoid Mary's position as a cook which exposed her to so  
69 many susceptible individuals. However, what enabled Typhoid Mary to stay in this  
70 role was her status as an asymptomatic carrier of the infection, which led to her  
71 release from quarantine on several occasions (Marineli et al., 2013). Similarly, the  
72 absence of symptoms in a number of SARS superspreaders delayed their admission  
73 to hospital and allowed them to continue spreading the virus (Centers for Disease  
74 Control and Prevention (CDC), 2003). These examples help underline that achieving  
75 a detailed understanding of the sources of heterogeneity in pathogen transmission is  
76 challenging because it results from complex interactions between multiple host  
77 behavioural, physiological, and immune traits. By dissecting the underlying genetic  
78 and sex-specific sources of variation in these traits we can assess how they influence  
79 three key components of pathogen transmission: contact rate between infected and  
80 susceptible individuals, the likelihood that contact will result in infection, and the  
81 duration of infection (VanderWaal & Ezenwa, 2016).

82

83 Infected-susceptible host contact rate is predominantly determined by host  
84 behaviours affecting locomotion and aggregation. Contact rates are also affected by  
85 population density (Keeling & Rohani, 2007), social group size (Patterson &  
86 Ruckstuhl, 2013), and behavioural syndromes (Keiser, Pinter-Wollman, et al., 2016).  
87 Social networks often exhibit extreme heterogeneity in the wild (Godfrey, 2013;  
88 Rushmore et al., 2013) and factors such as host genotype, sex condition, age and  
89 personality have been demonstrated to affect social aggregation in lab systems (de  
90 Bono & Bargmann, 1998; Keiser, Howell, et al., 2016; Saltz, 2011; Siva-Jothy & Vale,  
91 2019). Once individuals acquire an infection, their ability to clear and shed pathogens

92 is chiefly determined by physiological and immune mechanisms. Variation in these  
93 mechanisms chiefly influence the likelihood of pathogen transmission and the  
94 duration of infection (Grassly & Fraser, 2008; VanderWaal & Ezenwa, 2016). Many  
95 genetic and environmental sources of variation in physiological immunity have been  
96 described (Bou Sleiman et al., 2015; Lazzaro Brian P & Little Tom J, 2009; Ponton et  
97 al., 2013) including coinfection (Budischak et al., 2015; Lass Sandra et al., 2013),  
98 nutrition (Cornet, Bichet, Larcombe, Faivre, & Sorci, 2014; Vale, Choisy, & Little,  
99 2013), and stress (Beldomenico & Begon, 2010; Capitanio et al., 2008). It is relevant  
100 to note that most studies have addressed the effects of behavioural, physiological  
101 and immune traits on transmission in isolation of one another. However, there is  
102 increasing evidence that transmission heterogeneity is often explained by coupled  
103 heterogeneities in these traits and how they may covary (Bolzoni, Real, & Leo, 2007;  
104 Farrington, Whitaker, Unkel, & Pebody, 2013; White, Forester, & Craft, 2018). To fully  
105 understand the sources of heterogeneity in pathogen transmission, it is therefore  
106 essential to measure multiple behavioural, physiological, and immune traits in hosts.  
107

108 In the present work we aimed to test how common sources of variation between  
109 individuals (genetic background, sex and mating status) contribute to individual  
110 heterogeneity in pathogen transmission potential. The fruit fly, *Drosophila*  
111 *melanogaster*, is a powerful and genetically tractable model of infection, immunity  
112 and behaviour (Apidianakis & Rahme, 2009; Sokolowski, 2001). This makes it an ideal  
113 model system to investigate heterogeneity in pathogen transmission in the highly  
114 controlled conditions of a laboratory. We infected males and females from a range of  
115 naturally derived genotypes with *Drosophila* C Virus (DCV), a horizontally transmitted  
116 fly pathogen that causes behavioural, physiological and metabolic pathologies  
117 (Arnold, Johnson, & White, 2013; Chtarbanova et al., 2014; Gupta, Stewart, Rund,  
118 Monteith, & Vale, 2017; Vale & Jardine, 2015). We then quantified host traits and  
119 infection outcomes that directly impact pathogen transmission: (1) the infected  
120 lifespan, (2) the internal viral load, (3) how much virus was shed, and (4) the viral load

121 at death (VLAD). Finally, we integrated these measurements alongside previously  
122 described data on variation in social aggregation (Siva-Jothy & Vale, 2019) into a  
123 composite metric of individual transmission potential,  $V$  (Lloyd-Smith et al., 2005;  
124 VanderWaal & Ezenwa, 2016). Estimations of individual transmission potential,  $V$ ,  
125 allowed us to assess how genetic and sex-specific variation affects between-  
126 individual heterogeneity in pathogen transmission.

## 127 **Materials & Methods**

### 128 **Flies & Rearing Conditions**

129 Flies used in experiments were 3-5 days old and came from ten lines of the *Drosophila*  
130 Genetic Resource Panel (DGRP). These genetic backgrounds are five of the most  
131 resistant and susceptible to systemic *Drosophila C Virus* infection (Magwire et al.,  
132 2012). Virgin females were isolated from males within 7 hours of eclosion. Mated  
133 females and males were produced by rearing one female with one male for 24 hours.  
134 Mating was confirmed using oviposition within the following 24 hours and these egg's  
135 subsequent development. Flies were reared in plastic vials on a standard diet of  
136 Lewis medium at  $18\pm 1^\circ\text{C}$  with a 12 hour light:dark cycle. Stocks were tipped into new  
137 vials approximately every 14 days. One month before the experiments, flies were  
138 maintained at low density ( $\sim 10$  flies per vial) for two generations at  $25\pm 1^\circ\text{C}$  with a 12  
139 hour light:dark cycle.

140

### 141 **Virus Culture & Infection**

142 The *Drosophila C Virus* (DCV) isolate used in this experiment was originally isolated  
143 in Charolles, France and grown in Schneider *Drosophila* Line 2 (DL2) as previously  
144 described (Vale and Jardine, 2015b), diluted ten-fold ( $10^8$  infectious units per ml) in  
145 TRIS-HCl solution (pH=7.3), aliquoted and frozen at  $-70^\circ\text{C}$  until required. To infect  
146 with DCV, flies were pricked in the pleural suture with a 0.15mm diameter pin, bent  
147 at  $90^\circ$   $\sim 0.5\text{mm}$  from the tip, dipped in DCV.

148

### 149 **Measuring Lifespan and Viral Load at Death**

150 Lifespan and viral load at death were measured in the same fly. Following DCV  
151 infection, flies were isolated and reared in standard vials. Flies were then monitored  
152 every day until all individuals died, whereupon they were removed from vials, fixed in  
153  $50\mu\text{l}$  of TRI-reagent and frozen at  $-70^\circ\text{C}$ , to await DCV titre at death quantification. For  
154 twenty-seven of thirty treatment groups, the lifespan following infection and viral load

155 at death was measured for n=17-20, three treatment groups consisted of n=7-15 flies  
156 (Table S1).

157

### 158 **Viral Growth and Shedding Measurement Setup**

159 Due to destructive sampling, we measured the viral load and shedding of single flies  
160 at a single time point, either 1-, 2- or 3-days post-infection (DPI). Following DCV  
161 infection, single flies were placed into 1.5ml Eppendorf tubes with ~50 $\mu$ l of Lewis  
162 medium in the bottom of the tube. To measure viral shedding, flies were transferred  
163 to tubes for 24 hours, immediately following 1 or 2 days after systemic infection. After  
164 living in these tubes for a further 24 hours, flies were removed and homogenised in  
165 50 $\mu$ l of TRI-reagent, tubes were also washed out with 50 $\mu$ l of TRI-reagent by  
166 vortexing. These samples were then frozen at -70°C, to await DCV quantification by  
167 qPCR. For each combination of sex and genetic background over the three days viral  
168 load and virus shedding was measured, n=7-15 flies were measured (Table S2-S4).

169

### 170 **DCV RNA Extraction**

171 RNA was extracted from viral load at death and viral shedding samples by Phenol-  
172 Chloroform extraction. Samples were thawed on ice for 30 minutes before being  
173 incubated at room temperature for 5 minutes to allow dissociation of nucleo-protein  
174 complex. Samples were then centrifuged at 12,000 $\times$ g for 10 minutes at 4°C after  
175 which large debris was removed. For phase separation, samples were shaken  
176 vigorously for 15 seconds, 10 $\mu$ l of chloroform added, incubated at room temperature  
177 for a further 3 minutes before being centrifuged at 12,000 $\times$ g for 15 minutes at 4°C.  
178 Following phase separation, the upper aqueous layer was removed from each  
179 sample and added to 25 $\mu$ l of isopropanol, tubes were then inverted twice, before  
180 being centrifuged at 12,000 $\times$ g for 10 minutes at 4°C. Precipitated RNA was then  
181 washed by removing the supernatant, and re-dissolving the RNA pellet in 50 $\mu$ l of 75%  
182 ethanol before being centrifuged at 7,500 $\times$ g for 5 minutes at 4°C. RNA suspension  
183 was achieved by removing 40 $\mu$ l of the ethanol supernatant, allowing the rest to dry



184 by evaporation and dissolving the remaining RNA pellet in 20µl of RNase-free water.  
185 We extracted RNA from flies after 1, 2 or 3 days of infection using a semi-automatic  
186 MagMAX Express Particle Processor using the MagMAX-96 total RNA isolation kit  
187 manufacturer's protocol (Life Technologies, 2011) with the elution step extended to  
188 18 minutes. RNA samples were stored at -70°C to await reverse transcription.

189

### 190 **Reverse transcription & qPCR Protocol**

191 Extracted RNA was reverse-transcribed with M-MLV reverse transcriptase and  
192 random hexamer primers, before being diluted 1:1 with nuclease free water. cDNA  
193 samples were stored at -20°C to await qPCR analysis. DCV titre was quantified by  
194 qPCR using Fast SYBR Green Master Mix in an Applied Biosystems StepOnePlus  
195 system. Samples were exposed to a PCR cycle of 95°C for 2 minutes followed by 40  
196 cycles of: 95°C for 10 seconds followed by 60°C for 30 seconds. Forward and reverse  
197 primers used included 5'-AT rich flaps to improve fluorescence (DCV\_Forward: 5'  
198 AATAAATCATAAGCCACTGTGATTGATACAACAGAC 3'; DCV Reverse: 5'  
199 AATAAATCATAAGAAGCACGATACTTCTTCCAACC 3'). Across all plates, two  
200 technical replicates were carried out per sample. DCV titre was calculated by  
201 absolute quantification, using a standard curve created from a 10-fold serial dilution  
202 ( $1 \cdot 10^{-12}$ ) of DCV cDNA. Our detection threshold was calculated for each plate using  
203 the point at which two samples on our standard curve gave the same Ct value. The  
204 point of redundancy in a standard curve was taken to be equivalent to 0 viral  
205 particles. Due to our detection protocol measuring viral copies of RNA, we cannot  
206 comment on the viability of any detected virus. We transformed our measurements of  
207 viral RNA transformed in order for them to represent the amount of virus growing  
208 inside a whole fly rather than the amount in the qPCR well sample. To account for  
209 dilution between RNA extraction and qPCR we transformed DCV RNA samples by a  
210 factor of 3125, to represent the amount of DCV growing in, or shed by, flies. The mean  
211 qPCR efficiency was 116% with a standard error of  $\pm 2.9\%$

212

## 213 **Calculating Between-Individual Variation in Transmission Potential, $V$**

214 We used measures of virus shedding, lifespan following infection, and social  
215 aggregation to predict individual transmission potential. We integrated these  
216 measures based on a simple framework that describes transmission potential as a  
217 function of contact rate between susceptible and infected individuals, the likelihood  
218 that such contact will result in infection, and the duration of the infectious period  
219 (VanderWaal & Ezenwa, 2016). Using previously analysed data on social aggregation  
220 (Siva-Jothy & Vale, 2019), we used nearest neighbour distance as a measure of  
221 contact rate. Flies that aggregated more closely to conspecifics, have a higher  
222 contact rate, and are therefore more likely to spread DCV. We also assume that  
223 transmission likelihood increases with virus shedding. We therefore take the amount  
224 of virus shed by flies as a proximate measure of the likelihood that contact will result  
225 in infection. Using these traits, individual transmission potential,  $V$ , was calculated as:

226

$$227 \quad V = \frac{(\text{Virus Shedding Titre}) \times (\text{Lifespan})}{(\text{Aggregation Distance})}$$

228

229 Aggregation distance, lifespan following infection and virus shedding were all  
230 measured in separate experiments. Therefore, to calculate  $V$  as a measure of  
231 individual transmission potential, we simulated theoretical individuals by  
232 bootstrapping trait values sampled from each of these three datasets. We simulated  
233 60 individuals for each combination of sex and genetic background, assuming no  
234 specific covariance structure between traits, that is, all possible trait combinations  
235 were considered.

236

## 237 **Statistical Analysis**

238 Across all experiments, generalised linear models (GLMs) were used to analyse  
239 continuous response variables and logistic regressions were used to analyse

240 proportions. An effect of sex or mating was analysed in separate models comparing  
241 males or virgin females to the same dataset of mated females, respectively.

242

243 To analyse lifespan, two GLMs were constructed containing a three-way interaction  
244 genetic background, VLAD, and sex or mating (Table S6). The two GLMs for VLAD,  
245 contained either a two-way interaction between genetic background and sex or a  
246 two-way interaction between genetic background and mating (Table S6).

247

248 Due to zero-inflation, we used two models to sequentially analyse both viral load and  
249 virus shedding data. Viral load and virus shedding are broken down into qualitative  
250 (the proportion of non-zero values) and quantitative variation (differences between  
251 non-zero values). First, we conducted logistic regressions on all of the values in these  
252 datasets and analysed the proportion of values that were greater than zero. Logistic  
253 regressions analysing sex-differences in viral load included DPI (a 3-level factor: 1, 2  
254 or 3 days) and an interaction between genetic background and sex (Table S6). For  
255 analysing the effect of mating in females on viral load, logistic regressions included  
256 DPI and an interaction between genetic background and mating (Table S6). Logistic  
257 regressions of virus shedding used a similar model that also included quantitative  
258 viral load as a predictor (Table S6). After these logistic regressions, zeroes were  
259 removed from all datasets to analyse the subset of positive-values. The GLMs used  
260 to analyse these subsets included the same predictors as their corresponding logistic  
261 regressions, for viral load: an interaction between genetic background and sex or  
262 mating, alongside DPI, with the inclusion of quantitative viral load for virus shedding  
263 (Table S6).

264

265 Due to zero-inflation  $V$  was also analysed with a logistic regression followed by a  
266 GLM. A logistic regression was used to analyse the proportion of  $V$  values that were  
267 greater than zero with a two-way interaction between sex and genetic background  
268 as predictors (Table S6). Zero-values of  $V$  were then removed from the dataset, and

269 a GLM was used to analyse differences in the size of  $V$ , with an interaction between  
270 sex and genetic background included as a predictor (Table S6).

271

272 We calculated the amount of deviance and variance explained by predictors in  
273 logistic regressions and GLMs, respectively, by dividing the total deviance or  
274 variance explained by the model. Where appropriate, we corrected for multiple  
275 testing using Bonferroni correction. All statistical analyses and graphics produced in  
276 R 3.3.0 using the *ggplot2* (Wickham, 2016), *lme4* (Bates, Mächler, Bolker, & Walker,  
277 2015) and *multcomp* (Hothorn, Bretz, & Westfall, 2008) packages.

278 **Results**

279 **Lifespan Following Infection**

280 Infected lifespan varied significantly between males and females and the extent of  
281 this variation differed between host genetic backgrounds (Figure 1a; Table 1).  
282 Genetic background explained the most variance of any predictor across models  
283 assessing mating (7%) and sex (10.9%). Interactions with sex and mating also  
284 explained a further 2.7% and 1.5%, respectively (Figure 5; Table 1). We found no  
285 evidence that mating affected the lifespan of females following DCV infection (Figure  
286 1a; Table 1). Viral load at death (VLAD) was not affected by genetic background, sex  
287 or female mating status (Figure 1b; Table 2), and flies that died sooner following  
288 infection had greater VLAD than those that died later (Figure 1c; Table 1).

289

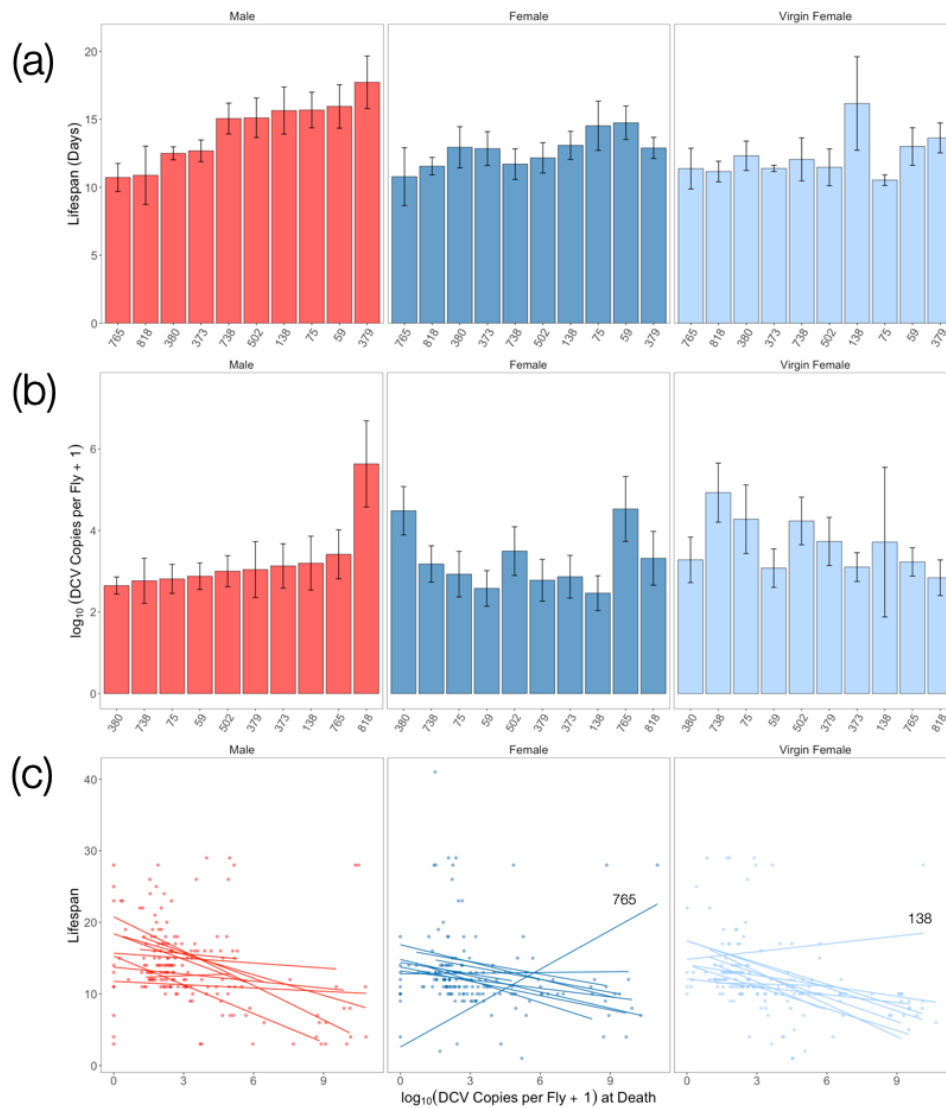

290

291 **Figure 1.** Mean $\pm$ SE (a) lifespan in days following infection and (b) the viral load at  
 292 death in males (red), mated females (blue), and virgin females (pale blue) of ten  
 293 genetic backgrounds. The x-axis shows the line number from the DGRP panel and is  
 294 in ascending order according to male flies. (c) the relationship between lifespan  
 295 following infection and the viral load of flies at death. Each point is an individual male  
 296 (red), mated female (blue), or virgin female (pale blue) fly. The nature of this  
 297 relationship within each genetic background is represented by a line of best fit with  
 298 outlier backgrounds labelled.

299

300

301

## 302 **Viral Load**

303 A substantial number of flies did not have detectable loads of DCV. These zero-values  
304 reflect qualitative variation and are likely caused by viral titres below the detection  
305 threshold of our qPCR and therefore reflect individuals with very low DCV loads, or  
306 no virus at all. We found extensive genetic variation in qualitative DCV load (Figure  
307 2a; Table 3) which was affected by sex (Figure 2a; Table 3) and female mating status  
308 (Figure 2a; Table 3). Relatively little deviance was explained by sex (0.002%), mating  
309 (0.13%), or genetic background in models testing sex (1.18%) and mating (2.83%)  
310 effects. The predictors that explained the most deviance were the interactions  
311 between genetic background and sex (5.58%) or mating (4.92%) (Figure 5; Table 3).  
312 The size of non-zero DCV loads reflects quantitative variation and was affected by  
313 similar interactions between mating and sex with genetic background (Figure 2b;  
314 Table 4). While <1% of variance was explained by sex and mating, much more was  
315 explained by genetic background (7.94% and 11%) alongside its interactions with  
316 sex (19.2%) and mating (4.38%) (Figure 5; Table 4).

317

318 The number of detectable DCV loads decreased following 1-day post-infection  
319 (pairwise comparison,  $p < 0.0001$ ) and remained lower than day 1 at day 3 (pairwise  
320 comparison,  $p = 0.0016$ ). There were significant changes in quantitative DCV load  
321 variation over the first three days of infection. Viral load peaked 2-days post-infection  
322 (pairwise comparison,  $p = 0.0012$ ), before decreasing to the same level as 1-day post-  
323 infection at 3-days post-infection (pairwise comparison,  $p = 0.068$ ).

324

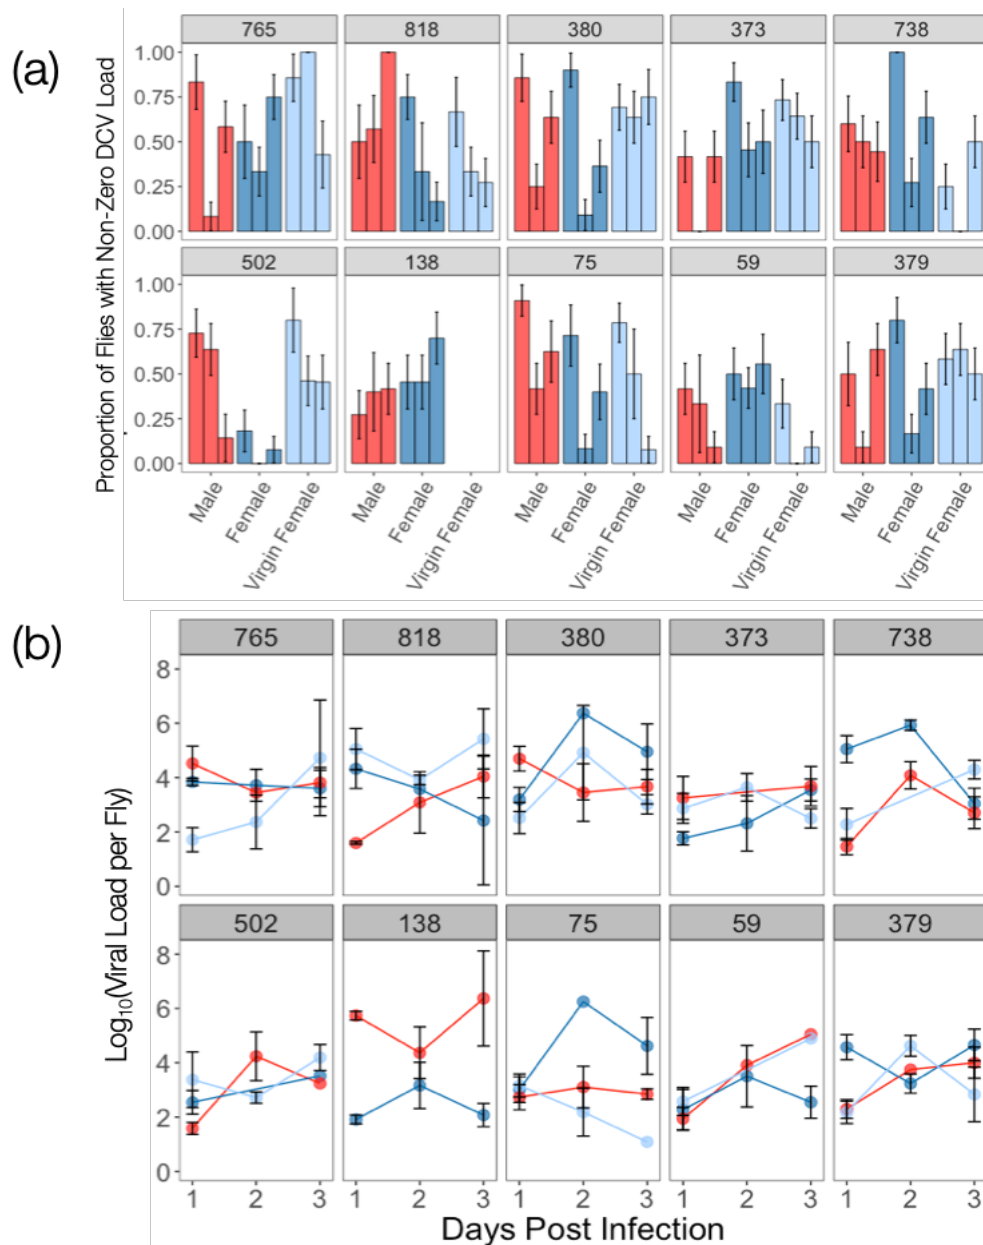

325

326 **Figure 2.** Mean  $\pm$  SE (a) proportion of flies with non-zero loads of DCV and the (b) viral  
327 titre of flies with non-zero DCV loads, over the first 3 days of infection. Across both  
328 panels, numbers in each pane denote the genetic background from the DGRP, while  
329 the colour of bars, points and lines represent sex and mating status. Males are shown  
330 in red, mated females in blue, and virgin females in pale blue. Bars of the same colour  
331 in each in pane in panel (a) represent (from left to right) days 1, 2 and 3 of infection.

332

333

334



335

## 336 **Virus Shedding**

337 Similar to measures of viral load, we did not detect DCV in the shedding of a number  
338 of flies. Here, we interpret zeroes to be reflective of individuals that shed very low  
339 titres of DCV, or no virus at all. Qualitative variation in DCV shedding was significantly  
340 affected by genetic background, with sex modulating the extent of this difference  
341 (Figure 3a; Table 5). Sex however, explained <1% of the deviance, while genetic  
342 background and its interaction with sex explained 2.2% and 3.07% (Figure 5). Mating  
343 did not affect qualitative DCV shedding (Figure 3a; Table 5) and explained <1% of  
344 the deviance (Figure 5; Table 5). In flies where DCV was detected in shedding,  
345 quantitative DCV shedding was affected by genetic background and the extent of  
346 this variation was determined by female mating status, but not sex (Figure 3b; Table  
347 6). The amount of variance explained by sex and in our models was <1%, in  
348 comparison with genetic background (9.48% and 5.82%) and its interactions with sex  
349 (8.87%) or mating (6.53%) (Figure 5; Table 6). Qualitative and quantitative DCV  
350 shedding peaked at day 2 (Figures 3a; Tables 5 & 6, pairwise comparisons,  
351  $p < 0.0001$ ). Across all treatment groups, there was no significant relationship between  
352 viral load and shedding (Figure S1; Table 6).

353

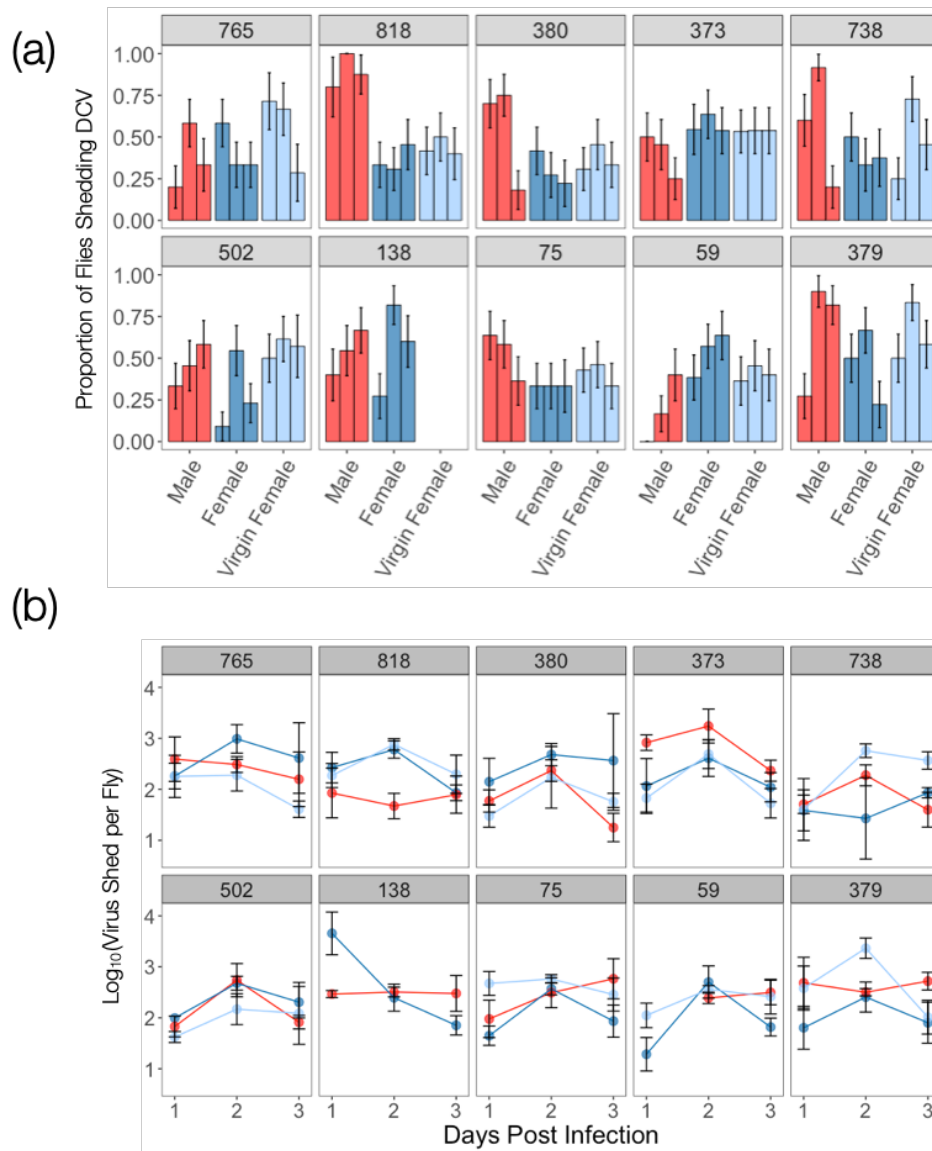

354

355 **Figure 3.** Mean±SE (a) proportion of flies shedding non-zero titres of DCV and the (b)  
 356 titre of the non-zero virus shedding subset over the first 3 days of infection. Panels  
 357 denote genetic background, while the colour of bars, points and lines represent sex  
 358 and mating status. Males are shown in red, mated females in blue, and virgin females  
 359 in pale blue. Bars of the same colour in each in pane in panel (a) represent (from left  
 360 to right) days 1, 2 and 3 of infection.

361

### 362 Variation in Transmission Potential, $V$

363 We incorporated the lifespan and virus shedding data described above alongside  
 364 previously gathered data on genetic and sex-specific variation in social aggregation

365 to calculate individual disease transmission potential,  $V$  (Lloyd-Smith et al., 2005;  
366 VanderWaal & Ezenwa, 2016). As a result of many flies not shedding DCV (Figure  
367 3a), the distribution of transmission potential,  $V$ , was zero-inflated (Figure 4a). Zero  
368 values of  $V$  represent individuals with no transmission risk (Figure 4a), as flies that  
369 shed no virus had no transmission potential, irrespective of their aggregation and  
370 lifespan. The distribution of  $V$  was also characterised by a right-extreme tail,  
371 comprised of individuals with high-risk transmission potentials relative to the  
372 population average (Figure 4a). Qualitative variation in  $V$  (the proportion of flies where  
373  $V > 0$ ) differed between males and females with the extent of this difference also  
374 determined by genetic background (Figure 4b; Table 7). Sex (0.28%), genetic  
375 background (2.3%) and the interaction between the two (2.83%) explained relatively  
376 little deviance in our models (Figure 5; Table 7). In quantitative variation in  $V$ , sex  
377 explained <1%, while genetic background and its interaction with sex explained  
378 4.13% and 11.4% of variance respectively (Figure 5; Table 8).

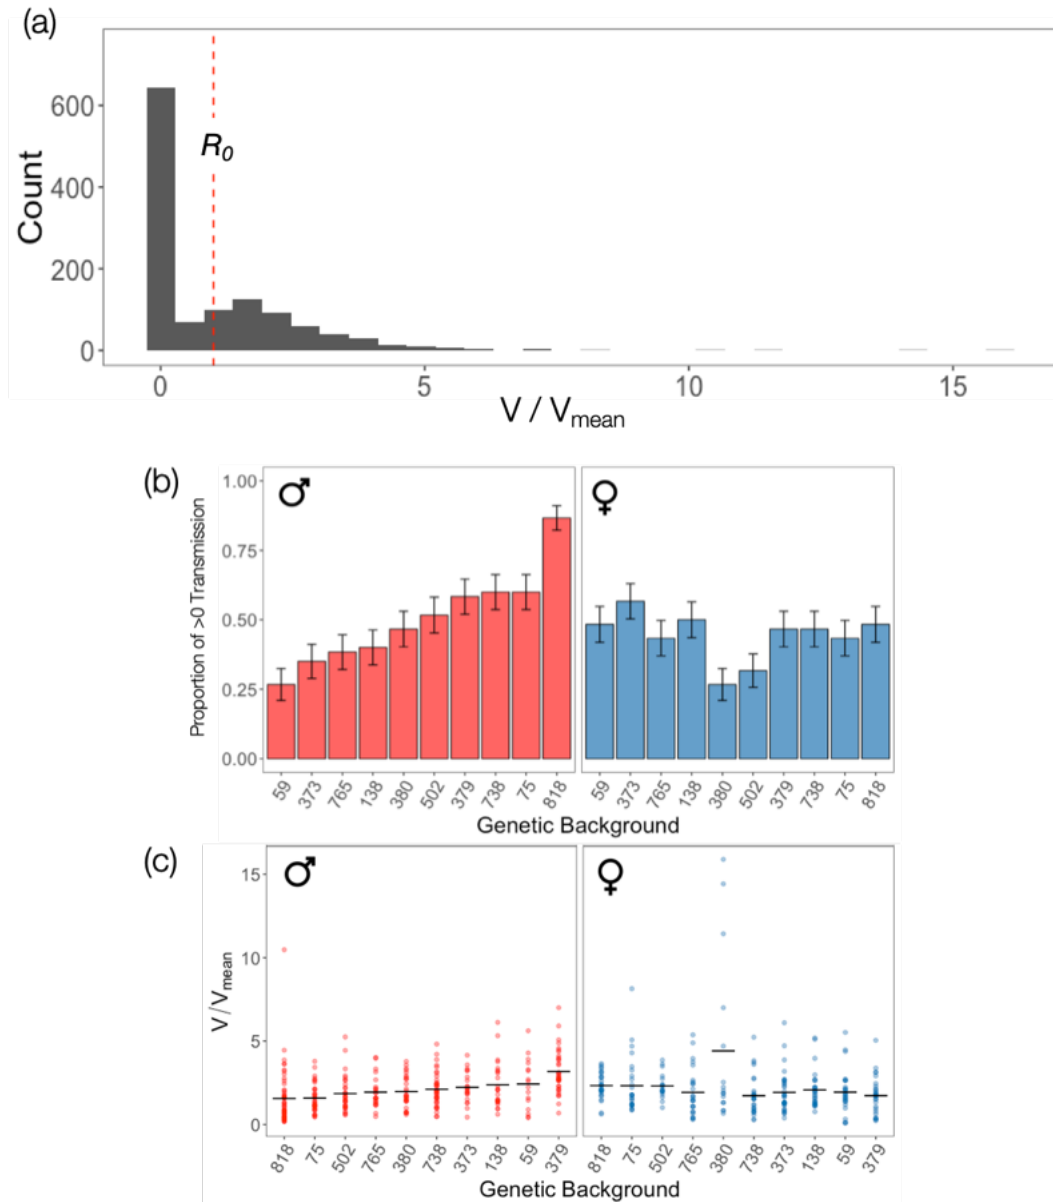

379

380 **Figure 4.** Bootstrap simulation results of transmission potential ( $V$ ) ( $n=60$ ): (a) the  
381 population-level distribution of  $V$  relative to the mean of the population. The red  
382 dashed line demarcates the average transmission potential of the population (similar  
383 to  $R_0$ ), a traditional metric used to describe a population's outbreak risk. The  
384 mean $\pm$ SE of (b) the proportion of flies with a non-zero transmission potential and (c)  
385 the transmission potential of flies with a non-zero transmission potential. In figure  
386 panels (b) and (c) sex is denoted by colour with males in red and females in blue.  
387 The x-axis of panels (b) and (c) is in ascending order of the male genetic  
388 backgrounds.

389

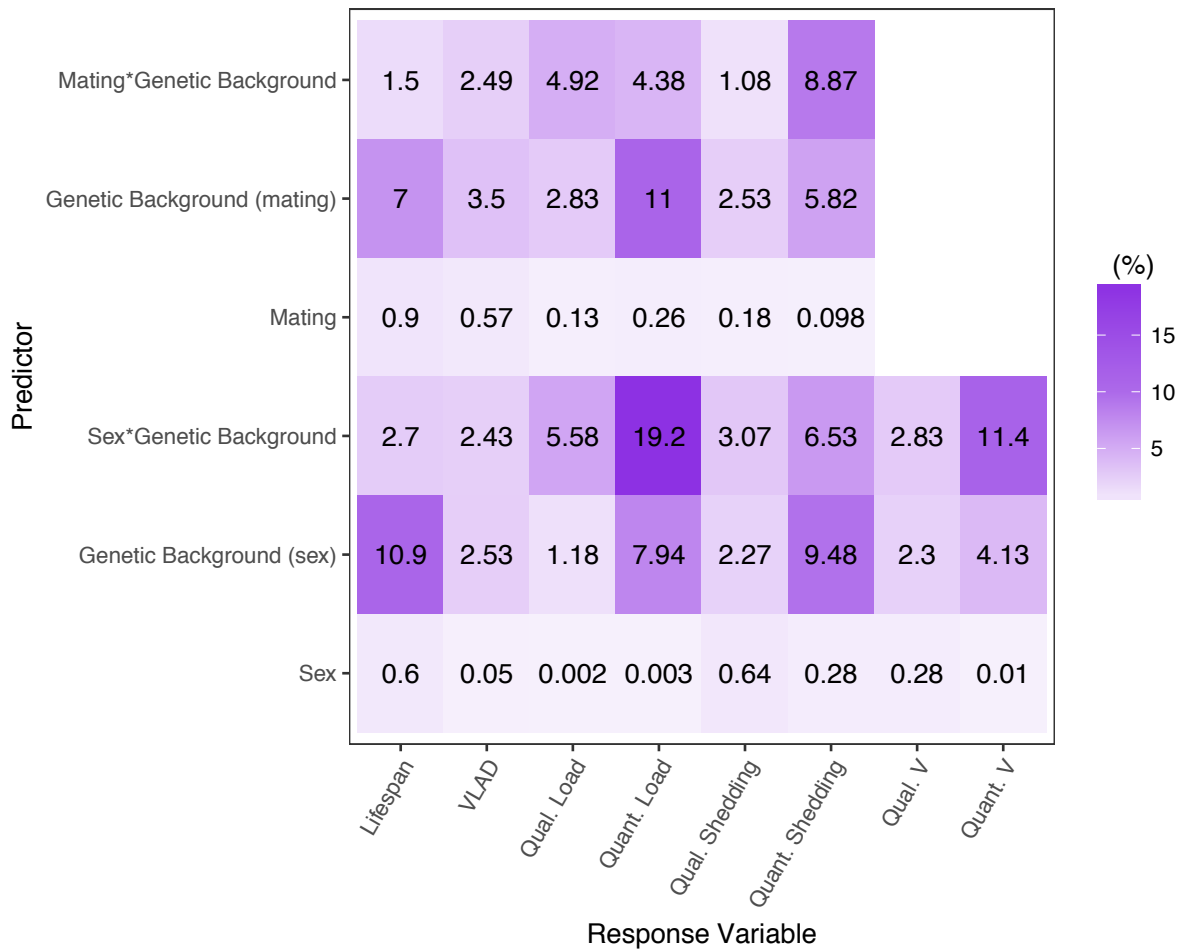

390

391 **Figure 5.** Summary of the percentage of variance or deviance explained by a subset  
 392 of predictors in analyses of disease transmission potential and outcomes of infection.

## 393 Discussion

394 We identified genetic and sex-specific variation in three key outcomes of DCV  
395 infection: lifespan following infection, virus shedding, and virus load. When combined  
396 with social aggregation data, this variation resulted in genetic and sex-specific  
397 variation in individual transmission potential,  $V$ . While all of these outcomes of  
398 infection influence transmission potential, due to many individuals not shedding any  
399 virus, virus shedding exerted more influence over  $V$  than variation in lifespan following  
400 infection and social aggregation. Due to this central role, below we discuss potential  
401 explanations for the effect of mating, as well as genetic and sex-specific variation on  
402 virus shedding, and link these to genetic and sex-specific variation in  $V$ .

403

### 404 The effect of host genetic background in generating heterogeneity in transmission

405 The genetic variation in virus shedding affected both qualitative and quantitative  
406 variation in DCV shedding. As the distributions of neither social aggregation nor  
407 lifespan following infection were zero-inflated, variation in virus shedding appears to  
408 be a key determinant of qualitative and quantitative variation in  $V$ . Differences  
409 between genetic backgrounds in qualitative shedding was a key determinant of  
410 variation in  $V$ , as there is no risk of pathogen transmission in the absence of shedding.  
411 Among individuals that shed DCV, between-individual heterogeneity in  $V$  was  
412 achieved through different routes. Some genetic backgrounds, such as males from  
413 RAL-818, showed a high proportion of individuals that are likely to spread DCV  
414 (Figure 4b), but only to relatively few individuals (Figure 4c). Conversely, other  
415 groups, such as females of the RAL-380 genetic backgrounds, showed one of the  
416 lowest proportions of individuals able to achieve transmission (Figure 4b), but the  
417 individuals that did achieve transmission include outliers with values of  $V$  that were  
418 orders of magnitude higher than the population average (Figure 4c).

419

420 Quantitative and qualitative variation in DCV shedding differed in how they were  
421 affected by host genetic background. Qualitative variation was affected by genetic

422 background as part of an interaction with host sex, while this interaction has no  
423 significant effect on quantitative DCV shedding (Tables 5 & 6). Similar differences are  
424 seen in the amount of deviance and variance genetic background explains in models  
425 of qualitative and quantitative variation in DCV shedding. Genetic background  
426 accounts for only 2.27% of deviance in qualitative DCV shedding whereas it accounts  
427 for 9.48% of the variance in quantitative DCV shedding (Figure 5). Genetic variation  
428 therefore appears to play an important role in determining shedding and affects  
429 qualitative and quantitative shedding in different ways. Similar effects of genetic  
430 backgrounds on parasite shedding have been reported in the Ramshorn snail  
431 species, *Biomphalaria glabrata*, during infection with *Schistosoma mansoni*.  
432 Genetic backgrounds differ in how many parasite eggs they shed and how quickly  
433 they start shedding after infection (Tavalire et al., 2016). The differences we see in  
434 the proportion of flies shedding DCV may be caused by a similar pattern of variation  
435 in individual's delaying virus shedding. Delaying the onset of shedding could be  
436 affected by a range of DCV infection symptoms. These include paralysis of muscles  
437 in the crop organ of the foregut, abdominal swelling, broad nutritional stress and  
438 reduced defecation rate (Chtarbanova et al., 2014).

439

440 Genetic background also appears to play a key role in transmission potential, we  
441 detected a significant effect on both qualitative and quantitative variation in *V*. The  
442 amount of deviance and variance explained by genetic background does not hugely  
443 differ (2.3% and 4.13%, respectively). However, when part of an interaction with sex,  
444 genetic background accounts for 11.4% of the variance in quantitative variation in  
445 DCV shedding, whereas this same interaction only accounts for 2.83% of the  
446 deviance in qualitative variation in shedding (Figure 5). Alongside other studies, this  
447 highlights the potential significance of genetic variation in pathogen shedding to  
448 generating transmission heterogeneity. For example, genetic variation in transmission  
449 was demonstrated using families of turbot fish (*Scophthalmus maximus*) which  
450 produced outbreaks that differed in how quickly individuals showed symptoms of

451 infection and died (Anacleto et al., 2019). Shedding may underlie this genetic  
452 variation in transmission as it was not directly measured and there were no  
453 significant differences in infection duration and contact rate (Anacleto et al., 2019).  
454 Common garden experiments have revealed shedding dynamics capable of  
455 influencing the population-level transmission dynamics of wild populations of the  
456 plant, *Plantago lanceolata*. In controlled laboratory settings, multi-strain coinfection  
457 was shown to increase the number of spores released of the fungal pathogen,  
458 *Podosphaera plantaginis*. Measures of natural populations have also demonstrated  
459 outbreak severity increases at higher levels of coinfection (Susi, Barrès, Vale, & Laine,  
460 2015). The relationship between spore shedding and coinfection has also been  
461 shown to be affected by host genotype, with genotypes significantly differing in the  
462 number of spores released over a number of days post-infection (Susi, Vale, & Laine,  
463 2015). Genetic variation in transmission potential has also been demonstrated in  
464 the freshwater ciliate, *Paramecium caudatum*, following *Holospora undulata* infection  
465 (Fellous et al., 2012). The genotype of the first individual to be infected was a key  
466 determinant of pathogen transmission as host genotype appears to affect the  
467 infectious potential of shed pathogens (Fellous et al., 2012). *H. undulata*  
468 infectiousness increases with host population density, as reduced variation in  
469 contact rate makes infectiousness the primary determinant of transmission  
470 (Magalon et al., 2010).

471

#### 472 The effect of host sex in generating heterogeneity in transmission

473 We also observed clear qualitative and quantitative differences in  $V$  between males and  
474 females, which is suggestive of sex-specific variation in disease transmission. While the  
475 extent of any difference between males and females is also determined by genetic  
476 background, a greater proportion of males tend to transmit DCV than females across  
477 these backgrounds. In DCV shedding, a greater proportion of males from several genetic  
478 backgrounds (RAL-379, RAL-738 and RAL-818) shed DCV than females (Figure 3a).



479 Interestingly, we see significant sex-specific differences in qualitative, but not quantitative,  
480 variation in DCV shedding. Other work has also shown a number of sex differences in  
481 pathogen and parasite shedding (Sanchez, Devevey, & Bize, 2011; Sheridan, Poulin,  
482 Ward, & Zuk, 2000; Thompson, Gipson, & Hall, 2017). Often these biases link to  
483 differences in the selection pressures applied by sexual reproduction (Duneau & Ebert,  
484 2012). Comparisons of mated and virgin female flies revealed mating effects which  
485 produced quantitative, but not qualitative, differences in shedding. While we did not  
486 measure  $V$  in virgin females, this mating effect may offer explanations for the sex  
487 differences seen in shedding and therefore  $V$ .

488

489 Sex-specific variation in qualitative differences in shedding exerts a significant influence  
490 over shedding (Figure 3a). It is important to note however, that in isolation, sex accounts  
491 for a miniscule 0.64% of the deviance in qualitative variation in shedding. Sex appears to  
492 play a more important role in conjunction with genetic background, the interaction  
493 between the two explaining 3.07% of deviance (Figure 5). While significant, sex-specific  
494 variation may play a relatively minor role in shedding. A variety of factors appear to  
495 underlie sex-differences in shedding across host-pathogen systems. For example, male-  
496 biased infection is common to many mammal hosts but generally absent from arthropod  
497 hosts (Sheridan et al., 2000). In the water flea, *Daphnia magna*, parasite spores are  
498 released into the environment upon death and females have been shown to release  
499 significantly more than males (Thompson et al., 2017). In the vole, *Microtus gryalis*, the  
500 faeces of females contains significantly more parasite eggs than that of males (Sanchez  
501 et al., 2011). Given that we see female-biased mortality to DCV infection (Figure 1a), it is  
502 perhaps surprising that shedding is not also female-biased. This could be due to

503 shedding being measured during the first three days of infection, whereas mortality  
504 occurred much later. We might therefore see sex-differences in shedding during the later  
505 stages of infection.

506

507 Both the qualitative and quantitative differences in  $V$  between males and females were  
508 determined alongside genetic background. While sex explained very little deviance and  
509 variance in qualitative and quantitative variation in  $V$  (Figure 6), its interaction with genetic  
510 background explained 2.83% and 11.4 %, respectively. Sex could therefore be an  
511 important source of variation in individual disease transmission. Sex differences in  
512 transmission or virus shedding, lifespan and social aggregation are commonly observed  
513 in a wide range of species (Duneau & Ebert, 2012; Ferrari, Cattadori, Nespereira, Rizzoli,  
514 & Hudson, 2004; Kaltz & Shykoff, 2001; Sanchez et al., 2011). Sex-specific variation has  
515 been relatively well-studied because sexes are easily distinguished in the wild, and  
516 examples of sexual dimorphism in physiological and behavioural traits are relatively  
517 common (Duneau and Ebert, 2012). Many mammalian hosts exhibit male-biased  
518 transmission (Ezenwa et al., 2016; Grear, Luong, & Hudson, 2012; Luong, Grear, &  
519 Hudson, 2009; Rhines, 2013), although there are exceptions of female-bias (Sanchez et  
520 al., 2011). In the white-footed mouse, *Peromyscus leucopus*, male-biased transmission  
521 is thought to be driven by sex differences in contact network connectivity, which has  
522 been linked to testosterone production (Foo, Nakagawa, Rhodes, & Simmons, 2017;  
523 Grear et al., 2012). Testosterone may be particularly relevant to transmission as its  
524 immunosuppressive (Foo et al., 2017) effects may also alter infectiousness and infection  
525 duration.

526

## 527 Female Mating Status in Shedding

528 Mated and virgin females did not qualitatively differ in DCV shedding; however, individuals  
529 did exhibit quantitative variation in shedding. While only 0.098% of the variance in  
530 quantitative shedding was explained by mating, the interaction between mating and  
531 genetic background explained 8.87% of the variance (Figure 5). This suggests that  
532 alongside host genetic background, mating might exert an important level of influence  
533 over shedding. One potential explanation for this mating effect are post-mating  
534 physiological changes in the intestine that can increase in defecation rates (Apger-  
535 McGlaughon and Wolfner, 2013). However, if this change is responsible for the significant  
536 effect of female mating, the virgin females from particular genetic backgrounds that shed  
537 more than mated females (Figure 3b) may be tolerant to these physiological changes.  
538 Relatively few have considered how mating affects aspects of disease transmission  
539 outside of contact rates (Altizer et al., 2003; Thrall et al., 2000). Particularly alongside  
540 other work in *Drosophila* that has demonstrated female-specific costs of infection (Kubiak  
541 and Tinsley, 2017; Short et al., 2012), this result highlights the importance of mating-  
542 induced physiological changes to transmission heterogeneity.

543

544 The difference between qualitative and quantitative variation in shedding relates to  
545 assumptions we make regarding how often DCV is shed. If DCV is always present in  
546 shedding, measures of zero reflect quantities of virus that are below the detection  
547 threshold of qPCR. While this could result in infectious individuals evading detection, as  
548 oral infection typically requires very high dosage (Gupta et al., 2017; Palmer et al., 2018),  
549 low-titre zero-values pose a smaller transmission risk. If DCV is not always shed, within-  
550 individual variation in when shedding occurs could be central to transmission

551 heterogeneity (Chen, Sanderson, & Lanzas, 2013). This is particularly relevant to our  
552 study as virus shedding was only measured at a single time point per fly, and we do  
553 not know how shedding, and therefore  $V$ , may change over time. Within-host, temporal  
554 variation in shedding is observed in a range of host-pathogen systems (Chen et al.,  
555 2013; Matthews et al., 2006; Mideo, Alizon, & Day, 2008). For example, avian hosts  
556 tend to shed more parasites during the late afternoon (Brawner III and Hill, 1999;  
557 Martinaud et al., 2009).

558

559 By combining measures of virus shedding, lifespan and social aggregation into a simple  
560 framework our work demonstrates that genetic and sex-specific variation can affect  
561 individual heterogeneity in disease transmission potential. We also show that genetic and  
562 sex-specific variation, as well as mating, can produce variation outcomes of infection.  
563 Alongside its interaction with sex, genetic background explains 5.41% of qualitative, and  
564 15.54% of quantitative, individual variation in transmission potential. While our results do  
565 not implicate a particular genetic background, males generally present a greater  
566 transmission risk than females. In addition to highlighting high-risk individuals, our results  
567 are congruous with the observation that the majority of infected individuals produce very  
568 few, if any, secondary cases of infection. Non-infectious individuals are particularly  
569 relevant to predicting outbreaks of infectious disease as they obscure high-risk  
570 individuals in traditional, population-wide estimations of outbreak risk. Our findings  
571 demonstrate the benefit of using a model laboratory system as well established as *D.*  
572 *melanogaster* to study disease transmission. The number of available protocols and  
573 methodologies are central to considering multiple traits central to disease transmission  
574 and holistically studying their underlying determinants.

575 **Acknowledgements**

576 J.A.S-J was funded by a NERC E3 DTP PhD studentship awarded to the University of  
577 Edinburgh. P.F.V was supported by a Branco Weiss fellowship  
578 (<https://brancoweissfellowship.org/>) and a Chancellor's Fellowship (School of Biological  
579 Sciences, University of Edinburgh).

580

581 We would like to thank F. Waldron for assistance with RNA extraction and  
582 troubleshooting as well as V. Gupta, K. Monteith, H. Borthwick, H. Cowan, and A. Reid  
583 for technical assistance and media preparation.

584

585 References

- 586 Altizer, S., Nunn, C. L., Thrall, P. H., Gittleman, J. L., Antonovics, J., Cunningham, A. A.,  
587 ... Pulliam, J. R. C. (2003). Social organization and parasite risk in mammals:  
588 Integrating theory and empirical studies. *Annual Review of Ecology Evolution and*  
589 *Systematics*, 34, 517–547. doi: 10.1146/annurev.ecolsys.34.030102.151725
- 590 Anacleto, O., Cabaleiro, S., Villanueva, B., Saura, M., Houston, R. D., Woolliams, J. A., &  
591 Doeschl-Wilson, A. B. (2019). Genetic differences in host infectivity affect disease  
592 spread and survival in epidemics. *Scientific Reports*, 9(1), 4924. doi: 10.1038/s41598-  
593 019-40567-w
- 594 Apger-McGlaughon, J., & Wolfner, M. F. (2013). Post-mating change in excretion by mated  
595 *Drosophila melanogaster* females is a long-term response that depends on sex peptide  
596 and sperm. *Journal of Insect Physiology*, 59(10), 1024–1030. doi:  
597 10.1016/j.jinsphys.2013.07.001
- 598 Apidianakis, Y., & Rahme, L. G. (2009). *Drosophila melanogaster* as a model host for  
599 studying *Pseudomonas aeruginosa* infection. *Nature Protocols*, 4(9), 1285–1294. doi:  
600 10.1038/nprot.2009.124
- 601 Arnold, P. A., Johnson, K. N., & White, C. R. (2013). Physiological and metabolic  
602 consequences of viral infection in *Drosophila melanogaster*. *The Journal of*  
603 *Experimental Biology*, 216(17), 3350–3357. doi: 10.1242/jeb.088138
- 604 Bates, D., Mächler, M., Bolker, B., & Walker, S. (2015). Fitting Linear Mixed-Effects  
605 Models Using **lme4**. *Journal of Statistical Software*, 67(1). doi: 10.18637/jss.v067.i01
- 606 Beldomenico, P. M., & Begon, M. (2010). Disease spread, susceptibility and infection  
607 intensity: vicious circles? *Trends in Ecology & Evolution*, 25(1), 21–27. doi:  
608 10.1016/j.tree.2009.06.015

- 609 Bolzoni, L., Real, L., & Leo, G. D. (2007). Transmission Heterogeneity and Control  
610 Strategies for Infectious Disease Emergence. *PLOS ONE*, 2(8), e747. doi:  
611 10.1371/journal.pone.0000747
- 612 Bou Sleiman, M. S., Osman, D., Massouras, A., Hoffmann, A. A., Lemaitre, B., &  
613 Deplancke, B. (2015). Genetic, molecular and physiological basis of variation in  
614 *Drosophila* gut immunocompetence. *Nature Communications*, 6. doi:  
615 10.1038/ncomms8829
- 616 Brawner III, W. R., & Hill, G. E. (1999). Temporal variation in shedding of coccidial  
617 oocysts: implications for sexual-selection studies. *Canadian Journal of Zoology*,  
618 77(2), 347–350. doi: 10.1139/z98-207
- 619 Brooks-Pollock, E., Roberts, G. O., & Keeling, M. J. (2014). A dynamic model of bovine  
620 tuberculosis spread and control in Great Britain. *Nature*, 511(7508), 228–231. doi:  
621 10.1038/nature13529
- 622 Budischak, S. A., Sakamoto, K., Megow, L. C., Cummings, K. R., Urban, J. F., & Ezenwa,  
623 V. O. (2015). Resource limitation alters the consequences of co-infection for both  
624 hosts and parasites. *International Journal for Parasitology*, 45(7), 455–463. doi:  
625 10.1016/j.ijpara.2015.02.005
- 626 Capitanio, J. P., Abel, K., Mendoza, S. P., Blozis, S. A., McChesney, M. B., Cole, S. W., &  
627 Mason, W. A. (2008). Personality and serotonin transporter genotype interact with  
628 social context to affect immunity and viral set-point in simian immunodeficiency  
629 virus disease. *Brain, Behavior, and Immunity*, 22(5), 676–689. doi:  
630 10.1016/j.bbi.2007.05.006
- 631 Centers for Disease Control and Prevention (CDC). (2003). Severe acute respiratory  
632 syndrome--Singapore, 2003. *MMWR. Morbidity and Mortality Weekly Report*, 52(18),  
633 405–411.

- 634 Chen, S., Sanderson, M., & Lanzas, C. (2013). Investigating effects of between- and within-  
635 host variability on *Escherichia coli* O157 shedding pattern and transmission.  
636 *Preventive Veterinary Medicine*, 109(1), 47–57. doi:  
637 10.1016/j.prevetmed.2012.09.012
- 638 Chtarbanova, S., Lamiable, O., Lee, K.-Z., Galiana, D., Troxler, L., Meignin, C., ... Imler, J.-  
639 L. (2014). *Drosophila* C virus systemic infection leads to intestinal obstruction.  
640 *Journal of Virology*, 88(24), 14057–14069. doi: 10.1128/JVI.02320-14
- 641 Cornet, S., Bichet, C., Larcombe, S., Faivre, B., & Sorci, G. (2014). Impact of host  
642 nutritional status on infection dynamics and parasite virulence in a bird-malaria  
643 system. *The Journal of Animal Ecology*, 83(1), 256–265. doi: 10.1111/1365-  
644 2656.12113
- 645 de Bono, M., & Bargmann, C. I. (1998). Natural variation in a neuropeptide Y receptor  
646 homolog modifies social behavior and food response in *C. elegans*. *Cell*, 94(5), 679–  
647 689. doi: 10.1016/S0092-8674(00)81609-8
- 648 Duneau, D., & Ebert, D. (2012). Host Sexual Dimorphism and Parasite Adaptation. *PLOS*  
649 *Biology*, 10(2), e1001271. doi: 10.1371/journal.pbio.1001271
- 650 Ezenwa, V. O., Archie, E. A., Craft, M. E., Hawley, D. M., Martin, L. B., Moore, J., &  
651 White, L. (2016). Host behaviour–parasite feedback: an essential link between animal  
652 behaviour and disease ecology. *Proc. R. Soc. B*, 283(1828), 20153078–20153078. doi:  
653 10.1098/rspb.2015.3078
- 654 Farrington, C. P., Whitaker, H. J., Unkel, S., & Pebody, R. (2013). Correlated Infections:  
655 Quantifying Individual Heterogeneity in the Spread of Infectious Diseases. *American*  
656 *Journal of Epidemiology*, 177(5), 474–486. doi: 10.1093/aje/kws260



- 657 Fellous, S., Duncan, A. B., Quillery, E., Vale, P. F., & Kaltz, O. (2012). Genetic influence on  
658 disease spread following arrival of infected carriers. *Ecology Letters*, *15*(3), 186–192.  
659 doi: 10.1111/j.1461-0248.2011.01723.x
- 660 Ferrari, N., Cattadori, I. M., Nespereira, J., Rizzoli, A., & Hudson, P. J. (2004). The role of  
661 host sex in parasite dynamics: field experiments on the yellow-necked mouse  
662 *Apodemus flavicollis*. *Ecology Letters*, *7*(2), 88–94. doi: 10.1046/j.1461-  
663 0248.2003.00552.x
- 664 Foo, Y. Z., Nakagawa, S., Rhodes, G., & Simmons, L. W. (2017). The effects of sex  
665 hormones on immune function: a meta-analysis. *Biological Reviews*, *92*(1), 551–571.  
666 doi: 10.1111/brv.12243
- 667 Gervasi, S. S., Civitello, D. J., Kilvitis, H. J., & Martin, L. B. (2015). The context of host  
668 competence: A role for plasticity in host-parasite dynamics. *Trends in Parasitology*,  
669 *31*(9), 419–425. doi: 10.1016/j.pt.2015.05.002
- 670 Godfrey, S. S. (2013). Networks and the ecology of parasite transmission: A framework for  
671 wildlife parasitology. *International Journal for Parasitology: Parasites and Wildlife*,  
672 *2*, 235–245. doi: 10.1016/j.ijppaw.2013.09.001
- 673 Grassly, N. C., & Fraser, C. (2008). Mathematical models of infectious disease transmission.  
674 *Nature Reviews. Microbiology*, *6*(3), 234–244. doi: 10.1038/nrmicro1845
- 675 Grear, D. A., Luong, L. T., & Hudson, P. J. (2012). Sex-biased transmission of a complex  
676 life-cycle parasite: why males matter. *Oikos*, *121*(9), 1446–1453. doi: 10.1111/j.1600-  
677 0706.2012.20358.x
- 678 Gupta, V., Stewart, C., Rund, S. S. C., Monteith, K., & Vale, P. F. (2017). Costs and benefits  
679 of sub-lethal *Drosophila* C virus infection. *Journal of Evolutionary Biology*. doi:  
680 10.1111/jeb.13096

- 681 Hothorn, T., Bretz, F., & Westfall, P. (2008). Simultaneous Inference in General Parametric  
682 Models. *Biometrical Journal*, 50(3), 346–363.
- 683 Kaltz, O., & Shykoff, J. A. (2001). Male and female *Silene latifolia* plants differ in per-  
684 contact risk of infection by a sexually transmitted disease. *Journal of Ecology*, 89(1),  
685 99–109. doi: 10.1046/j.1365-2745.2001.00527.x
- 686 Keeling, M. J., & Rohani, P. (2007). *Chapter One Contact Tracing Operates by Refining the*  
687 *Targeting of Other Control Measures. 1.4. What Are Mathematical Models?*
- 688 Keiser, C. N., Howell, K. A., Pinter-Wollman, N., Pruitt, J. N., Woolhouse, ME., Kortet, R.,  
689 ... Edelstein-Keshet, L. (2016). Personality composition alters the transmission of  
690 cuticular bacteria in social groups. *Biology Letters*, 12(7), 338–342. doi:  
691 10.1098/rsbl.2016.0297
- 692 Keiser, C. N., Pinter-Wollman, N., Augustine, D. A., Ziemba, M. J., Hao, L., Lawrence, J.  
693 G., & Pruitt, J. N. (2016). Individual differences in boldness influence patterns of  
694 social interactions and the transmission of cuticular bacteria among group-mates.  
695 *Proceedings of the Royal Society B: Biological Sciences*, 283(1829), 20160457–  
696 20160457. doi: 10.1098/rspb.2016.0457
- 697 Kubiak, M., & Tinsley, M. C. (2017). Sex-Specific Routes To Immune Senescence In  
698 *Drosophila melanogaster*. *Scientific Reports*, 7(1), 10417. doi: 10.1038/s41598-017-  
699 11021-6
- 700 Lass Sandra, Hudson Peter J., Thakar Juilee, Saric Jasmina, Harvill Eric, Albert Réka, &  
701 Perkins Sarah E. (2013). Generating super-shedders: co-infection increases bacterial  
702 load and egg production of a gastrointestinal helminth. *Journal of The Royal Society*  
703 *Interface*, 10(80), 20120588. doi: 10.1098/rsif.2012.0588

- 704 Lazzaro Brian P, & Little Tom J. (2009). Immunity in a variable world. *Philosophical*  
705 *Transactions of the Royal Society B: Biological Sciences*, 364(1513), 15–26. doi:  
706 10.1098/rstb.2008.0141
- 707 Li, Y., Yu, I. T. S., Xu, P., Lee, J. H. W., Wong, T. W., Ooi, P. L., & Sleight, A. C. (2004).  
708 Predicting super spreading events during the 2003 severe acute respiratory syndrome  
709 epidemics in Hong Kong and Singapore. *American Journal of Epidemiology*, 160(8),  
710 719–728. doi: 10.1093/aje/kwh273
- 711 Life Technologies. (2011). *MagMAX-96 Total RNA Isolation Kit User Guide*. Carlsbad, CA  
712 USA: Life Technologies Corporation.
- 713 Lloyd-Smith, J. O., Schreiber, S. J., Kopp, P. E., Getz, W. M., Schreiber, SJ., Kopp, PE., ...  
714 Kjelvik, MK. (2005). Superspreading and the effect of individual variation on disease  
715 emergence. *Nature*, 438(7066), 355–359. doi: 10.1038/nature04153
- 716 Luong, L. T., Grear, D. A., & Hudson, P. J. (2009). Male hosts are responsible for the  
717 transmission of a tropically transmitted parasite, *Pterygodermatites peromysci*, to the  
718 intermediate host in the absence of sex-biased infection. *International Journal for*  
719 *Parasitology*, 39(11), 1263–1268. doi: 10.1016/j.ijpara.2009.03.007
- 720 Magalon, H., Nidelet, T., Martin, G., & Kaltz, O. (2010). Host growth conditions influence  
721 experimental evolution of life history and virulence of a parasite with vertical and  
722 horizontal transmission. *Evolution; International Journal of Organic Evolution*,  
723 64(7), 2126–2138. doi: 10.1111/j.1558-5646.2010.00974.x
- 724 Magwire, M. M., Fabian, D. K., Schweyen, H., Cao, C., Longdon, B., Bayer, F., & Jiggins, F.  
725 M. (2012). Genome-Wide Association Studies Reveal a Simple Genetic Basis of  
726 Resistance to Naturally Coevolving Viruses in *Drosophila melanogaster*. *PLoS*  
727 *Genetics*, 8(11). doi: 10.1371/journal.pgen.1003057

- 728 Marineli, F., Tsoucalas, G., Karamanou, M., & Androutsos, G. (2013). Mary Mallon (1869-  
729 1938) and the history of typhoid fever. *Annals of Gastroenterology : Quarterly*  
730 *Publication of the Hellenic Society of Gastroenterology*, 26(2), 132–134.
- 731 Martinaud, G., Billaudelle, M., & Moreau, J. (2009). Circadian variation in shedding of the  
732 oocysts of *Isospora turdi* (Apicomplexa) in blackbirds (*Turdus merula*): An adaptive  
733 trait against desiccation and ultraviolet radiation. *International Journal for*  
734 *Parasitology*, 39(6), 735–739. doi: 10.1016/j.ijpara.2008.11.006
- 735 Matthews, L., Low, J. C., Gally, D. L., Pearce, M. C., Mellor, D. J., Heesterbeek, J. a P., ...  
736 Woolhouse, M. E. J. (2006). Heterogeneous shedding of *Escherichia coli* O157 in  
737 cattle and its implications for control. *Proceedings of the National Academy of*  
738 *Sciences of the United States of America*, 103(3), 547–552. doi:  
739 10.1073/pnas.0503776103
- 740 Mideo, N., Alizon, S., & Day, T. (2008). Linking within- and between-host dynamics in the  
741 evolutionary epidemiology of infectious diseases. *Trends in Ecology & Evolution*,  
742 23(9), 511–517. doi: 10.1016/j.tree.2008.05.009
- 743 Palmer, W. H., Medd, N. C., Beard, P. M., & Obbard, D. J. (2018). Isolation of a natural  
744 DNA virus of *Drosophila melanogaster*, and characterisation of host resistance and  
745 immune responses. *PLOS Pathogens*, 14(6), e1007050. doi:  
746 10.1371/journal.ppat.1007050
- 747 Patterson, J. E. H., & Ruckstuhl, K. E. (2013). Parasite infection and host group size: a meta-  
748 analytical review. *Parasitology*, 140(7), 803–813. doi: 10.1017/S0031182012002259
- 749 Paull, S. H., Song, S., McClure, K. M., Sackett, L. C., Kilpatrick, A. M., & Johnson, P. T.  
750 (2011). From superspreaders to disease hotspots: linking transmission across hosts  
751 and space. *Frontiers in Ecology and the Environment*, 10(2), 75–82. doi:  
752 10.1890/110111

- 753 Paull, S. H., Song, S., McClure, K. M., Sackett, L. C., Kilpatrick, A. M., & Johnson, P. T. J.  
754 (2012). From superspreaders to disease hotspots: linking transmission across hosts  
755 and space. *Frontiers in Ecology and the Environment*, *10*(2), 75–82. doi:  
756 10.1890/110111
- 757 Ponton, F., Wilson, K., Holmes, A. J., Cotter, S. C., Raubenheimer, D., & Simpson, S. J.  
758 (2013). Integrating nutrition and immunology: A new frontier. *Journal of Insect*  
759 *Physiology*, *59*(2), 130–137. doi: 10.1016/j.jinsphys.2012.10.011
- 760 Rhines, A. S. (2013). The role of sex differences in the prevalence and transmission of  
761 tuberculosis. *Tuberculosis*, *93*(1), 104–107. doi: 10.1016/j.tube.2012.10.012
- 762 Rushmore, J., Caillaud, D., Matamba, L., Stumpf, R. M., Borgatti, S. P., & Altizer, S. (2013).  
763 Social network analysis of wild chimpanzees provides insights for predicting  
764 infectious disease risk. *Journal of Animal Ecology*, *82*(5), 976–986. doi:  
765 10.1111/1365-2656.12088
- 766 Saltz, J. B. (2011). NATURAL GENETIC VARIATION IN SOCIAL ENVIRONMENT  
767 CHOICE: CONTEXT-DEPENDENT GENE-ENVIRONMENT CORRELATION IN  
768 DROSOPHILA MELANOGASTER. *Evolution*, *65*(8), 2325–2334. doi:  
769 10.1111/j.1558-5646.2011.01295.x
- 770 Sanchez, A., Devevey, G., & Bize, P. (2011). Female-biased infection and transmission of  
771 the gastrointestinal nematode *Trichuris arvicolae* infecting the common vole,  
772 *Microtus arvalis*. *International Journal for Parasitology*, *41*(13), 1397–1402. doi:  
773 10.1016/j.ijpara.2011.09.004
- 774 Shaw, D. J., & Dobson, A. P. (1995). Patterns of macroparasite abundance and aggregation in  
775 wildlife populations: a quantitative review. *Parasitology*, *111*(S1), S111–S133. doi:  
776 10.1017/S0031182000075855

- 777 Sheridan, L. A. D., Poulin, R., Ward, D. F., & Zuk, M. (2000). Sex differences in parasitic  
778 infections among arthropod hosts: is there a male bias? *Oikos*, 88(2), 327–334. doi:  
779 10.1034/j.1600-0706.2000.880211.x
- 780 Short, S. M., Wolfner, M. F., & Lazzaro, B. P. (2012). Female *Drosophila melanogaster*  
781 suffer reduced defense against infection due to seminal fluid components. *Journal of*  
782 *Insect Physiology*, 58(9), 1192–1201. doi: 10.1016/j.jinsphys.2012.06.002
- 783 Siva-Jothy, J. A., & Vale, P. F. (2019). Viral infection causes sex-specific changes in fruit fly  
784 social aggregation behaviour. *BioRxiv*, 630913. doi: 10.1101/630913
- 785 Sokolowski, M. B. (2001). *Drosophila*: genetics meets behaviour. *Nature Reviews. Genetics*,  
786 2(11), 879–890. doi: 10.1038/35098592
- 787 Stein, R. A. (2011). Super-spreaders in infectious diseases. *International Journal of*  
788 *Infectious Diseases : IJID : Official Publication of the International Society for*  
789 *Infectious Diseases*, 15(8), e510-3. doi: 10.1016/j.ijid.2010.06.020
- 790 Susi, H., Barrès, B., Vale, P. F., & Laine, A.-L. (2015). Co-infection alters population  
791 dynamics of infectious disease. *Nature Communications*, 6, 5975. doi:  
792 10.1038/ncomms6975
- 793 Susi, H., Vale, P. F., & Laine, A.-L. (2015). Host Genotype and Coinfection Modify the  
794 Relationship of within and between Host Transmission. *The American Naturalist*,  
795 186(2), 000–000. doi: 10.1086/682069
- 796 Tavalire, H. F., Blouin, M. S., & Steinauer, M. L. (2016). Genotypic variation in host  
797 response to infection affects parasite reproductive rate. *International Journal for*  
798 *Parasitology*, 46(2), 123–131. doi: 10.1016/j.ijpara.2015.10.001
- 799 Thompson, O., Gipson, S. A. Y., & Hall, M. D. (2017). The impact of host sex on the  
800 outcome of co-infection. *Scientific Reports*, 7(1), 910. doi: 10.1038/s41598-017-  
801 00835-z

- 802 Thrall, P. H., Antonovics, J., & Dobson, A. P. (2000). Sexually transmitted diseases in  
803 polygynous mating systems: prevalence and impact on reproductive success.  
804 *Proceedings of the Royal Society B: Biological Sciences*, 267(1452), 1555–1563.
- 805 Vale, P. F., Choisy, M., & Little, T. J. (2013). Host nutrition alters the variance in parasite  
806 transmission potential. *Biology Letters*, 9(2). doi: 10.1098/rsbl.2012.1145
- 807 Vale, P. F., & Jardine, M. D. (2015). Sex-specific behavioural symptoms of viral gut  
808 infection and Wolbachia in *Drosophila melanogaster*. *Journal of Insect Physiology*,  
809 82, 28–32. doi: 10.1016/j.jinsphys.2015.08.005
- 810 VanderWaal, K. L., & Ezenwa, V. O. (2016). Heterogeneity in pathogen transmission:  
811 mechanisms and methodology. *Functional Ecology*, n/a-n/a. doi: 10.1111/1365-  
812 2435.12645
- 813 White, L. A., Forester, J. D., & Craft, M. E. (2018). Covariation between the physiological  
814 and behavioral components of pathogen transmission: host heterogeneity determines  
815 epidemic outcomes. *Oikos*, 127(4), 538–552. doi: 10.1111/oik.04527
- 816 Wickham, H. (2016). *ggplot2: Elegant Graphics for Data Analysis*. Springer-Verlag New  
817 York.
- 818 Wilson, K., Bjørnstad, O. N., Dobson, A. P., Merler, S., Poglayen, G., Read, A. F., &  
819 Skorpning, A. (2002). Chapter 2: Heterogeneities in macroparasite infections: patterns  
820 and processes. *The Ecology of Wildlife Diseases*. Oxford University Press, Oxford, 6–  
821 44.
- 822 Woolhouse, M. E. J., Dye, C., Etard, J.-F., Smith, T., Charlwood, J. D., Garnett, G. P., ...  
823 Anderson, R. M. (1997). Heterogeneities in the transmission of infectious agents :  
824 *Proceedings of the National Academy of Sciences of the United States of America*,  
825 94(January), 338–342.
- 826

827 **Tables**

| Response Variable            | Predictor                      | Df | F    | %Variance Explained | p-value |
|------------------------------|--------------------------------|----|------|---------------------|---------|
| Lifespan Following Infection | Sex                            | 1  | 2.00 | 0.6                 | 0.16    |
|                              | Genetic Background             | 9  | 3.92 | 10.9                | <0.0001 |
|                              | VLAD                           | 1  | 38.9 | 12.1                | <0.0001 |
|                              | Sex*Genetic Background         | 9  | 0.96 | 2.7                 | 0.47    |
|                              | Sex*VLAD                       | 1  | 5.46 | 1.7                 | 0.02    |
|                              | Genetic Background*VLAD        | 9  | 0.63 | 1.8                 | 0.77    |
|                              | Sex*Genetic Background*VLAD    | 9  | 2.67 | 7.4                 | 0.005   |
|                              | Mating                         | 1  | 2.74 | 0.9                 | 0.099   |
|                              | Genetic Background             | 8  | 2.43 | 7.0                 | 0.01    |
|                              | VLAD                           | 1  | 32.3 | 10.2                | <0.0001 |
|                              | Mating*Genetic Background      | 8  | 0.54 | 1.5                 | 0.84    |
|                              | Mating*VLAD                    | 1  | 3.78 | 1.2                 | 0.053   |
|                              | Genetic Background*VLAD        | 8  | 1.71 | 4.9                 | 0.087   |
|                              | Mating*Genetic Background*VLAD | 8  | 1.46 | 4.2                 | 0.16    |

828

829 **Table 1.** Model outputs for the generalized linear modelling tests performed on  
 830 lifespan following DCV infection. The VLAD acronym is used in place of 'viral load at  
 831 death'. Separate analyses were used to test the effect of sex and mating in females.

832



| Response Variable          | Predictor                 | Df | F    | % Variance Explained | p-value |
|----------------------------|---------------------------|----|------|----------------------|---------|
| Viral Load at Death (VLAD) | Sex                       | 1  | 0.17 | 0.05                 | 0.68    |
|                            | Genetic Background        | 9  | 0.96 | 2.53                 | 0.47    |
|                            | Sex*Genetic Background    | 9  | 0.92 | 2.43                 | 0.50    |
|                            | Mating                    | 1  | 1.90 | 0.57                 | 0.17    |
|                            | Genetic Background        | 8  | 1.30 | 3.5                  | 0.24    |
|                            | Mating*Genetic Background | 8  | 0.93 | 2.49                 | 0.50    |

833

834 **Table 2.** Model outputs for the generalized linear modelling tests performed on the  
835 viral load at death of flies infected with DCV. Separate analyses were used to test the  
836 effect of sex and mating in females.

837

| Response Variable    | Predictor                 | Df | $\chi^2$ | % Deviance Explained | $p$ -value |
|----------------------|---------------------------|----|----------|----------------------|------------|
| Qualitative DCV Load | Sex                       | 1  | 0.019    | 0.002                | 0.89       |
|                      | Genetic Background        | 9  | 9.58     | 1.18                 | 0.39       |
|                      | DPI                       | 2  | 36.6     | 4.52                 | <0.0001    |
|                      | Sex*Genetic Background    | 9  | 45.2     | 5.58                 | <0.0001    |
|                      | Mating                    | 1  | 1.01     | 0.13                 | 0.31       |
|                      | Genetic Background        | 8  | 22.4     | 2.83                 | 0.008      |
|                      | DPI                       | 2  | 27.2     | 3.43                 | <0.0001    |
|                      | Mating*Genetic Background | 8  | 39.0     | 4.92                 | <0.0001    |

838

839 **Table 3.** Model outputs for the binomial logistic regression conducted on qualitative  
840 DCV loads (the proportion of non-zero DCV loads). The DPI acronym is used in place  
841 of 'days post-infection'. Separate analyses were used to test the effect of sex and  
842 mating in females.

843

| Response Variable     | Predictor                  | DF | F      | % Variance Explained | p-value |
|-----------------------|----------------------------|----|--------|----------------------|---------|
| Quantitative DCV Load | Sex                        | 1  | 0.0062 | 0.003                | 0.94    |
|                       | Genetic Background         | 9  | 2.24   | 7.94                 | 0.02    |
|                       | DPI                        | 2  | 3.37   | 2.65                 | 0.036   |
|                       | Sex* Genetic Background    | 9  | 5.41   | 19.2                 | <0.0001 |
|                       | Mating                     | 1  | 0.68   | 0.26                 | 0.41    |
|                       | Genetic Background         | 8  | 3.18   | 11.0                 | 0.0012  |
|                       | DPI                        | 2  | 4.66   | 3.60                 | 0.01    |
|                       | Mating* Genetic Background | 8  | 1.42   | 4.38                 | 0.19    |

844

845 **Table 4.** Model outputs for the GLM analysis conducted on quantitative DCV load (the  
846 titres of non-zero DCV loads). The DPI acronym is used in place of 'days post-  
847 infection'. Separate analyses were used to test the effect of sex and mating in  
848 females.

| Response Variable        | Predictor                 | Df | $\chi^2$ | % Deviance Explained | p-value |
|--------------------------|---------------------------|----|----------|----------------------|---------|
| Qualitative DCV Shedding | Sex                       | 1  | 4.93     | 0.64                 | 0.026   |
|                          | Genetic Background        | 9  | 17.6     | 2.27                 | 0.04    |
|                          | Viral Load                | 1  | 0.03     | 0.004                | 0.85    |
|                          | DPI                       | 2  | 25.1     | 3.25                 | <0.0001 |
|                          | Sex*Genetic Background    | 9  | 23.8     | 3.07                 | 0.005   |
|                          | Mating                    | 1  | 1.33     | 0.18                 | 0.25    |
|                          | Genetic Background        | 8  | 19.0     | 2.53                 | 0.025   |
|                          | Viral Load                | 1  | 1.10     | 0.15                 | 0.29    |
|                          | DPI                       | 2  | 7.66     | 1.02                 | 0.022   |
|                          | Mating*Genetic Background | 8  | 8.12     | 1.08                 | 0.42    |

849

850 **Table 5.** Model outputs for the GLM analysis conducted on qualitative DCV shedding  
851 (the proportion of sheddings with non-zero readings of DCV). The DPI acronym is  
852 used in place of 'days post-infection'. Separate analyses were used to test the effect  
853 of sex and mating in females.

854

| Response Variable         | Predictor                 | Df | F    | % Variance Explained | p-value |
|---------------------------|---------------------------|----|------|----------------------|---------|
| Quantitative DCV Shedding | Sex                       | 1  | 0.67 | 0.28                 | 0.42    |
|                           | Genetic Background        | 9  | 2.52 | 9.48                 | 0.009   |
|                           | Viral Load                | 1  | 5.03 | 4.21                 | 0.007   |
|                           | DPI                       | 2  | 0.23 | 0.095                | 0.63    |
|                           | Sex*Genetic Background    | 9  | 1.73 | 6.53                 | 0.082   |
|                           | Mating                    | 1  | 0.22 | 0.098                | 0.64    |
|                           | Genetic Background        | 8  | 1.44 | 5.82                 | 0.17    |
|                           | Viral Load                | 1  | 11.2 | 10.1                 | <0.0001 |
|                           | DPI                       | 2  | 0.18 | 0.08                 | 0.67    |
|                           | Mating*Genetic Background | 8  | 2.46 | 8.87                 | 0.014   |

855

856 **Table 6.** Model outputs for the GLM analysis conducted on quantitative DCV  
857 shedding (the subset of shedding with non-zero readings of DCV). The DPI acronym  
858 is used in place of 'days post-infection'. Separate analyses were used to test the  
859 effect of sex and mating in females.

860

| Response Variable  | Predictor | Df | $\chi^2$ | % Deviance Explained | p-value |
|--------------------|-----------|----|----------|----------------------|---------|
| Qualitative<br>$V$ | Sex       | 1  | 4.58     | 0.28                 | 0.032   |
|                    | Line      | 9  | 38.2     | 2.30                 | <0.0001 |
|                    | Sex*Line  | 9  | 47.0     | 2.83                 | <0.0001 |

861

862 **Table 7.** Model outputs for the logistic regression analysis conducted on qualitative

863  $V$ (the proportion of non-zero  $V$  values).

864

| Response Variable   | Predictor | Df | F     | % Variance Explained | p-value |
|---------------------|-----------|----|-------|----------------------|---------|
| Quantitative<br>$V$ | Sex       | 1  | 0.077 | 0.01                 | 0.78    |
|                     | Line      | 9  | 2.51  | 4.13                 | 0.008   |
|                     | Sex*Line  | 9  | 6.94  | 11.4                 | <0.0001 |

865

866 **Table 8.** Model outputs for the GLM analysis conducted on quantitative  $V$ (the

867 subset with non-zero  $V$  values).

868 Supplementary Figures and Tables

869

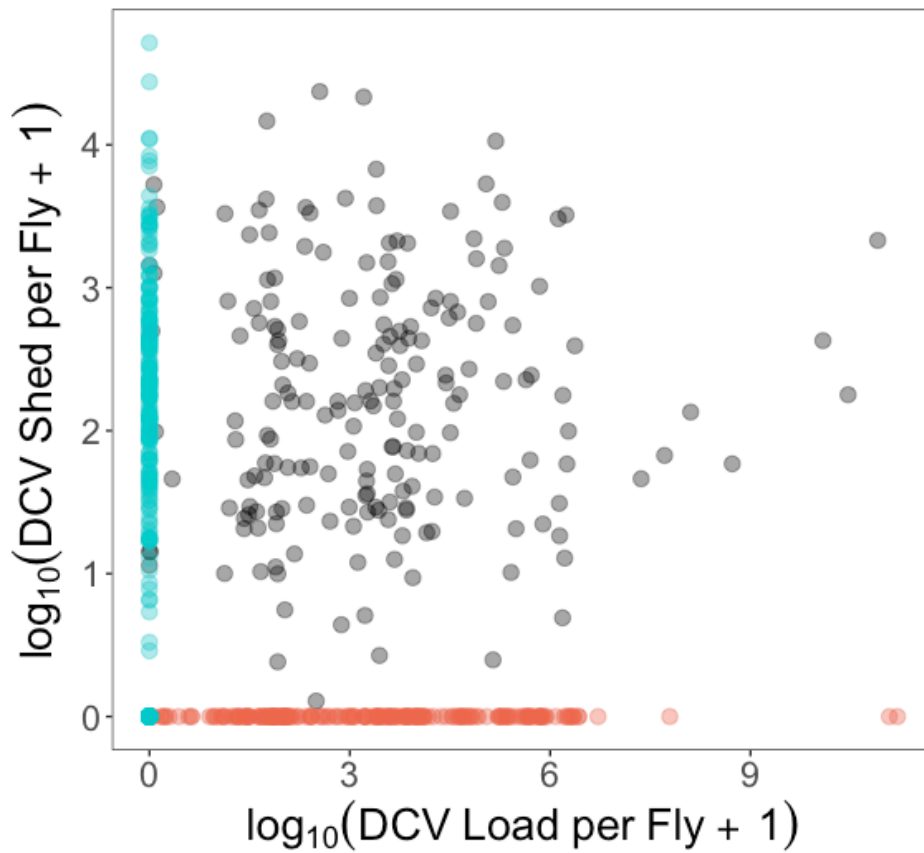

870

871 **Figure S1.** The relationship between the viral load of flies and the amount of virus  
872 they shed into their environment. The two distinct phenotypes, where individuals  
873 show a zero-value for shedding or load and a positive-value for the other trait, are  
874 marked by blue (supersponges) or red (supershedders).

875

|               | 59 | 75 | 138 | 373 | 379 | 380 | 502 | 738 | 765 | 818 |
|---------------|----|----|-----|-----|-----|-----|-----|-----|-----|-----|
| Male          | 20 | 20 | 18  | 19  | 17  | 18  | 17  | 19  | 18  | 19  |
| Female        | 17 | 20 | 13  | 19  | 19  | 20  | 19  | 18  | 15  | 18  |
| Virgin Female | 20 | 18 | 7   | 18  | 20  | 19  | 19  | 20  | 16  | 20  |

876

877 **Table S1** – The number of flies measured for lifespan and viral load at death for  
 878 each combination of genetic background and sex/female mating status.

879

(a)

|               | 59 | 75 | 138 | 373 | 379 | 380 | 502 | 738 | 765 | 818 |
|---------------|----|----|-----|-----|-----|-----|-----|-----|-----|-----|
| Male          | 12 | 11 | 11  | 12  | 11  | 11  | 12  | 11  | 11  | 6   |
| Mated Female  | 13 | 12 | 11  | 12  | 12  | 12  | 11  | 12  | 12  | 12  |
| Virgin Female | 12 | 14 | NA  | 15  | 12  | 13  | 12  | 12  | 7   | 12  |

(b)

|               | 59 | 75 | 138 | 373 | 379 | 380 | 502 | 738 | 765 | 818 |
|---------------|----|----|-----|-----|-----|-----|-----|-----|-----|-----|
| Male          | 12 | 12 | 11  | 12  | 11  | 12  | 11  | 12  | 12  | 6   |
| Mated Female  | 14 | 12 | 11  | 11  | 12  | 11  | 11  | 11  | 12  | 13  |
| Virgin Female | 12 | 14 | NA  | 14  | 12  | 11  | 13  | 10  | 9   | 12  |

(c)

|               | 59 | 75 | 138 | 373 | 379 | 380 | 502 | 738 | 765 | 818 |
|---------------|----|----|-----|-----|-----|-----|-----|-----|-----|-----|
| Male          | 11 | 12 | 12  | 12  | 12  | 11  | 12  | 10  | 12  | 7   |
| Mated Female  | 11 | 11 | 10  | 13  | 12  | 11  | 13  | 11  | 12  | 12  |
| Virgin Female | 11 | 13 | NA  | 13  | 12  | 13  | 11  | 12  | 8   | 11  |

880

881 **Table S2** – The number of viral load samples for each treatment group (a) 1 DPI, (b)  
 882 2 DPI and (c) 3 DPI.

883

| (a)           |  | 59 | 75 | 138 | 373 | 379 | 380 | 502 | 738 | 765 | 818 |
|---------------|--|----|----|-----|-----|-----|-----|-----|-----|-----|-----|
| Male          |  | 5  | 9  | 2   | 5   | 4   | 6   | 8   | 6   | 5   | 3   |
| Mated Female  |  | 6  | 5  | 5   | 10  | 8   | 9   | 2   | 9   | 3   | 9   |
| Virgin Female |  | 4  | 11 | NA  | 11  | 7   | 9   | 4   | 3   | 6   | 4   |

  

| (b)           |  | 59 | 75 | 138 | 373 | 379 | 380 | 502 | 738 | 765 | 818 |
|---------------|--|----|----|-----|-----|-----|-----|-----|-----|-----|-----|
| Male          |  | 1  | 5  | 3   | 1   | 1   | 3   | 7   | 6   | 1   | 4   |
| Mated Female  |  | 8  | 4  | 5   | 5   | 2   | 1   | 1   | 3   | 4   | 1   |
| Virgin Female |  | 1  | 3  | NA  | 9   | 7   | 7   | 6   | 1   | 5   | 4   |

  

| (c)           |  | 59 | 75 | 138 | 373 | 379 | 380 | 502 | 738 | 765 | 818 |
|---------------|--|----|----|-----|-----|-----|-----|-----|-----|-----|-----|
| Male          |  | 1  | 5  | 5   | 5   | 7   | 7   | 1   | 4   | 7   | 6   |
| Mated Female  |  | 5  | 4  | 7   | 4   | 5   | 4   | 1   | 7   | 9   | 2   |
| Virgin Female |  | 1  | 1  | NA  | 6   | 6   | 6   | 5   | 6   | 3   | 3   |

884

885 **Table S3** – The number of non-zero viral load samples for each treatment group (a)

886 1 DPI, (b) 2 DPI and (c) 3 DPI.

887

| (a)           |  | 59 | 75 | 138 | 373 | 379 | 380 | 502 | 738 | 765 | 818 |
|---------------|--|----|----|-----|-----|-----|-----|-----|-----|-----|-----|
| Male          |  | 10 | 11 | 10  | 12  | 11  | 10  | 12  | 10  | 10  | 5   |
| Mated Female  |  | 13 | 12 | 11  | 11  | 12  | 12  | 11  | 12  | 12  | 12  |
| Virgin Female |  | 11 | 14 | NA  | 15  | 12  | 13  | 12  | 12  | 7   | 12  |

  

| (b)           |  | 59 | 75 | 138 | 373 | 379 | 380 | 502 | 738 | 765 | 818 |
|---------------|--|----|----|-----|-----|-----|-----|-----|-----|-----|-----|
| Male          |  | 12 | 12 | 11  | 11  | 10  | 12  | 11  | 12  | 12  | 7   |
| Mated Female  |  | 14 | 12 | 11  | 11  | 12  | 11  | 11  | 9   | 12  | 13  |
| Virgin Female |  | 11 | 13 | NA  | 13  | 12  | 11  | 13  | 11  | 9   | 12  |

  

| (c)           |  | 59 | 75 | 138 | 373 | 379 | 380 | 502 | 738 | 765 | 818 |
|---------------|--|----|----|-----|-----|-----|-----|-----|-----|-----|-----|
| Male          |  | 10 | 11 | 12  | 12  | 11  | 11  | 12  | 10  | 9   | 7   |
| Mated Female  |  | 11 | 9  | 10  | 13  | 9   | 9   | 13  | 8   | 12  | 11  |
| Virgin Female |  | 10 | 12 | NA  | 13  | 12  | 12  | 7   | 11  | 7   | 10  |

888

889 **Table S4** – The number of virus shedding samples for each treatment group (a) 1

890 DPI, (b) 2 DPI and (c) 3 DPI.



| (a) |               | 59 | 75 | 138 | 373 | 379 | 380 | 502 | 738 | 765 | 818 |
|-----|---------------|----|----|-----|-----|-----|-----|-----|-----|-----|-----|
|     | Male          | 0  | 7  | 4   | 6   | 3   | 7   | 4   | 6   | 2   | 4   |
|     | Mated Female  | 5  | 4  | 3   | 6   | 6   | 5   | 1   | 6   | 7   | 4   |
|     | Virgin Female | 4  | 6  | NA  | 8   | 6   | 4   | 6   | 3   | 5   | 5   |

  

| (b) |               | 59 | 75 | 138 | 373 | 379 | 380 | 502 | 738 | 765 | 818 |
|-----|---------------|----|----|-----|-----|-----|-----|-----|-----|-----|-----|
|     | Male          | 10 | 7  | 6   | 5   | 9   | 9   | 5   | 11  | 7   | 7   |
|     | Mated Female  | 8  | 4  | 9   | 7   | 8   | 3   | 6   | 3   | 4   | 4   |
|     | Virgin Female | 5  | 6  | NA  | 7   | 10  | 5   | 8   | 8   | 6   | 6   |

  

| (c) |               | 59 | 75 | 138 | 373 | 379 | 380 | 502 | 738 | 765 | 818 |
|-----|---------------|----|----|-----|-----|-----|-----|-----|-----|-----|-----|
|     | Male          | 4  | 4  | 8   | 3   | 9   | 2   | 7   | 2   | 3   | 6   |
|     | Mated Female  | 7  | 3  | 6   | 7   | 2   | 2   | 3   | 3   | 4   | 5   |
|     | Virgin Female | 4  | 4  | NA  | 7   | 7   | 4   | 4   | 5   | 2   | 4   |

891

892 **Table S5** – The number of non-zero virus shedding samples for each treatment

893 group (a) 1 DPI, (b) 2 DPI and (c) 3 DPI.

894

895

| Response Variable | Analysis            | Predictors                                      |
|-------------------|---------------------|-------------------------------------------------|
| Lifespan          | GLM                 | Sex * Genetic Background * VLAD                 |
|                   |                     | Mating * Genetic Background * VLAD              |
| VLAD              | GLM                 | Sex * Genetic Background                        |
|                   |                     | Mating * Genetic Background                     |
| Qualitative Load  | Logistic Regression | Sex * Genetic Background + DPI                  |
|                   |                     | Mating * Genetic Background + DPI               |
| Quantitative Load | GLM                 | Sex * Genetic Background + DPI                  |
|                   |                     | Mating * Genetic Background + DPI               |
| Qualitative Shed  | Logistic Regression | Sex * Genetic Background + Quant. Load + DPI    |
|                   |                     | Mating * Genetic Background + Quant. Load + DPI |
| Quantitative Shed | GLM                 | Sex * Genetic Background + Quant. Load + DPI    |
|                   |                     | Mating * Genetic Background + Quant. Load + DPI |
| Qualitative V     | Logistic Regression | Sex * Genetic Background                        |
| Quantitative V    | GLM                 | Sex * Genetic Background                        |

896

897 **Table S6.** Summaries of the logistic regression and GLMs used to analyse the  
898 response variables of our experiments. All interactions are fully-factorial and marked  
899 using an asterisk (\*).
